# Supplementary material
Source: Springer Nature journal article supplement (https://www.springermedizin.de/resource/supplementary/12939_2009_171_MOESM2_ESM.pdf/9551642)

(a)

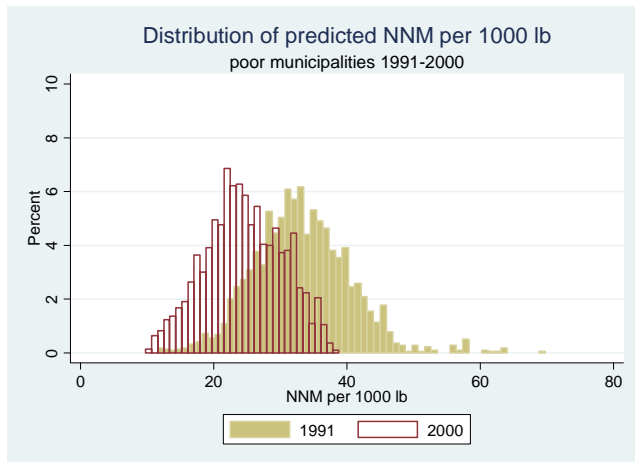

(b)

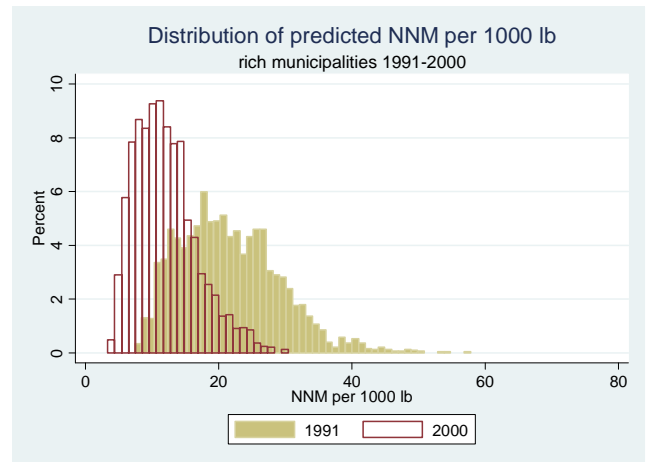

(c)

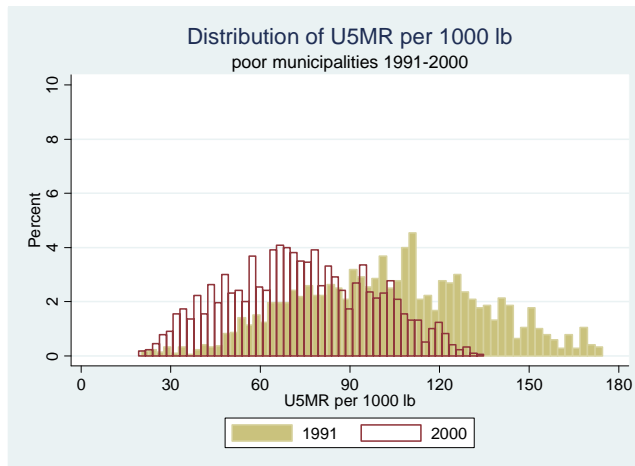

(d)

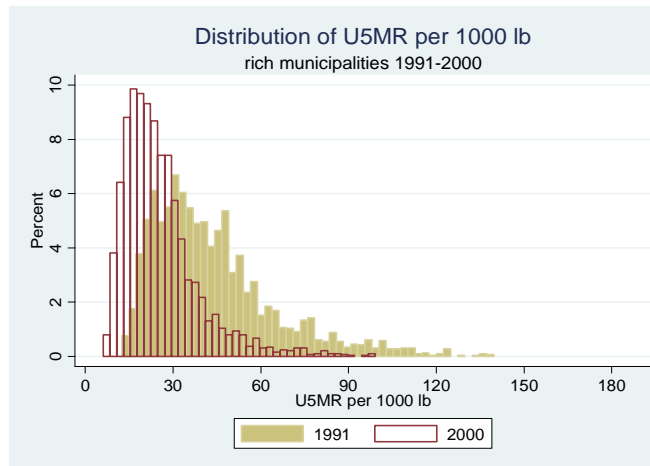

Supplement: MOESM2 [file 9551642]
